# Supplementary material for: Randomised study of PF-06410293, an adalimumab (ADL) biosimilar, compared with reference ADL for the treatment of active rheumatoid arthritis: results from weeks 26–52, including a treatment switch from reference ADL to PF-06410293
Source: PubMed Central journal article supplement — RMD Open. 2021 Apr 21;7(2):e001578. doi: 10.1136/rmdopen-2021-001578 (PMC8061859; doi:10.1136/rmdopen-2021-001578), 2021-04-21
Supplement: rmdopen-2021-001578supp001.pdf [file rmdopen-2021-001578supp001.pdf]

Fleischmann RM et al., *RMD Open***SUPPLEMENTARY MATERIAL****Randomised study of PF-06410293, an adalimumab (ADL) biosimilar, compared with reference ADL for the treatment of active rheumatoid arthritis: results from week 26–52, including a treatment switch from reference ADL to PF-06410293**

Roy M. Fleischmann, Daniel F. Alvarez, Amy E. Bock, Carol Cronenberger, Ivana Vranic, Wuyan Zhang, Rieke Alten

**Supplemental table 1.** All-causality TEAEs occurring in  $\geq 2\%$  of patients in any treatment group (safety population)

**Supplemental table 2.** Summary of all-causality SAEs occurring in  $\geq 2\%$  of patients in any treatment group (safety population)

**Supplemental table 3.** Grade 3 or higher all-causality TEAEs occurring in  $\geq 2$  patients in any treatment group (safety population)

**Supplemental table 4.** Mean (SD) serum drug trough concentrations (ng/mL) versus time by NAb status during TP2

**Supplemental figure 1.** EULAR response rates by visit (ITT population) in patients treated with **a)** ADL-PF/ADL-PF; **b)** ADL-EU/ADL-EU; and **c)** ADL-EU/ADL-PF

**Supplemental figure 2.** DAS28-4(CRP)  $< 2.6$  by visit (ITT population)

**Supplemental figure 3.** ACR/EULAR-defined remission by visit (ITT population) in patients treated with **a)** ADL-PF/ADL-PF; **b)** ADL-EU/ADL-EU; and **c)** ADL-EU/ADL-PF

**Supplemental figure 4.** Mean change ( $\pm$ SE) from week 26 (pre-dose) in HAQ-DI by visit (ITT population)

Fleischmann RM et al., *RMD Open***Supplemental table 1.** All-causality TEAEs occurring in  $\geq 2\%$  of patients in any treatment group (safety population)\*

| <b>SOC and PT</b>                                 | <b>ADL-PF/ADL-PF<br/>(n=283)</b> | <b>ADL-EU/ADL-EU<br/>(n=135)</b> | <b>ADL-EU/ADL-PF<br/>(n=133)</b> |
|---------------------------------------------------|----------------------------------|----------------------------------|----------------------------------|
| <b>Number of AEs</b>                              | 243                              | 112                              | 100                              |
| Patients with any AE, n (%)                       | 123 (43.5)                       | 60 (44.4)                        | 51 (38.3)                        |
| Blood and lymphatic<br>system disorders           | 9 (3.2)                          | 7 (5.2)                          | 2 (1.5)                          |
| Neutropenia                                       | 2 (0.7)                          | 4 (3.0)                          | 2 (1.5)                          |
| Infections and infestations                       | 49 (17.3)                        | 23 (17.0)                        | 28 (21.1)                        |
| Bronchitis                                        | 1 (0.4)                          | 0                                | 4 (3.0)                          |
| Upper respiratory tract<br>infection              | 4 (1.4)                          | 5 (3.7)                          | 6 (4.5)                          |
| Urinary tract infection                           | 3 (1.1)                          | 1 (0.7)                          | 5 (3.8)                          |
| Viral upper respiratory<br>tract infection        | 15 (5.3)                         | 5 (3.7)                          | 6 (4.5)                          |
| Injury, poisoning and<br>procedural complications | 12 (4.2)                         | 3 (2.2)                          | 5 (3.8)                          |
| Fall                                              | 4 (1.4)                          | 1 (0.7)                          | 4 (3.0)                          |
| Investigations                                    | 22 (7.8)                         | 13 (9.6)                         | 10 (7.5)                         |
| Blood creatinine<br>increased                     | 1 (0.4)                          | 3 (2.2)                          | 0                                |

Fleischmann RM et al., *RMD Open*

|                                                 |          |          |          |
|-------------------------------------------------|----------|----------|----------|
| Alanine aminotransferase increased              | 5 (1.8)  | 4 (3.0)  | 4 (3.0)  |
| Aspartate aminotransferase increased            | 3 (1.1)  | 4 (3.0)  | 1 (0.8)  |
| Musculoskeletal and connective tissue disorders | 21 (7.4) | 13 (9.6) | 10 (7.5) |
| Rheumatoid arthritis                            | 4 (1.4)  | 2 (1.5)  | 3 (2.3)  |
| Nervous system disorders                        | 14 (4.9) | 1 (0.7)  | 5 (3.8)  |
| Headache                                        | 9 (3.2)  | 1 (0.7)  | 2 (1.5)  |
| Vascular disorders                              | 12 (4.2) | 5 (3.7)  | 3 (2.3)  |
| Hypertension                                    | 8 (2.8)  | 3 (2.2)  | 3 (2.3)  |

---

\*Includes all AEs starting on or after the first injection of study drug in TP2, and ongoing AEs at the start of TP2 that worsened on or after the first injection of study drug in TP2.

ADL-EU, reference adalimumab sourced from the European Union; ADL-PF, PF-06410293; AE, adverse event; PT, preferred term; SOC, system organ class; TEAE, treatment-emergent adverse event; TP2, treatment period 2.

Fleischmann RM et al., *RMD Open*

**Supplemental table 2.** Summary of all-causality SAE SOC's reported by  $\geq 2\%$  of patients in any treatment group (safety population)\*

| SOC and PT                  | ADL-PF/ADL-PF<br>(n=283) | ADL-EU/ADL-EU<br>(n=135) | ADL-EU/ADL-PF<br>(n=133) |
|-----------------------------|--------------------------|--------------------------|--------------------------|
| Patients with any TEAE, n   | 4 (1.4)                  | 6 (4.4)                  | 3 (2.3)                  |
| (%)                         |                          |                          |                          |
| Infections and infestations | 1 (0.4)                  | 3 (2.2)                  | 0                        |
| Bronchopulmonary            | 0                        | 1 (0.7)                  | 0                        |
| aspergillosis               |                          |                          |                          |
| Ear infection               | 1 (0.4)                  | 0                        | 0                        |
| Gastroenteritis             | 0                        | 1 (0.7)                  | 0                        |
| salmonella                  |                          |                          |                          |
| Pneumonia                   | 0                        | 1 (0.7)                  | 0                        |

\*Includes all AEs starting on or after the first injection of study drug in TP2, and ongoing AEs at the start of TP2 that worsened on or after the first injection of study drug in TP2.

ADL-EU, reference adalimumab sourced from the European Union; ADL-PF, PF-06410293; AE, adverse event; PT, preferred term; SAE, serious adverse event; SOC, system organ class; TP2, treatment period 2.

Fleischmann RM et al., *RMD Open*

**Supplemental table 3.** Grade 3 or higher all-causality SOC<sub>s</sub> reported by ≥1% of patients in any treatment group (safety population)

| <b>SOC and PT</b>             | <b>ADL-PF/ADL-PF<br/>(n=283)</b> | <b>ADL-EU/ADL-EU<br/>(n=135)</b> | <b>ADL-EU/ADL-PF<br/>(n=133)</b> |
|-------------------------------|----------------------------------|----------------------------------|----------------------------------|
| <b>Number of AEs</b>          | 10                               | 8                                | 4                                |
| Patients with any TEAE, n (%) | 7 (2.5)                          | 7 (5.2)                          | 4 (3.0)                          |
| Infections and infestations   | 1 (0.4)                          | 2 (1.5)                          | 1 (0.8)                          |
| Ear infection                 | 1 (0.4)                          | 0                                | 0                                |
| Gastroenteritis               | 0                                | 1 (0.7)                          | 0                                |
| salmonella                    |                                  |                                  |                                  |
| Pneumonia                     | 0                                | 1 (0.7)                          | 0                                |
| Urinary tract infection       | 0                                | 0                                | 1 (0.8)                          |
| Vascular disorders            | 1 (0.4)                          | 2 (1.5)                          | 0                                |
| Hypertension                  | 1 (0.4)                          | 1 (0.7)                          | 0                                |
| Venous thrombosis             | 0                                | 1 (0.7)                          | 0                                |
| limb                          |                                  |                                  |                                  |

ADL-EU, reference adalimumab sourced from the European Union; ADL-PF,

PF-06410293; AE, adverse event; PT, preferred term; SOC, system organ class;

TEAE, treatment-emergent adverse event.

Fleischmann et al., *RMD Open***Supplemental table 4.** Mean (SD) serum drug trough concentrations (ng/mL) versus time by NAb status during TP2

| Visit (0 hours post-dose) | ADL-PF/ADL-PF |           | ADL-EU/ADL-EU |           | ADL-EU/ADL-PF |           |
|---------------------------|---------------|-----------|---------------|-----------|---------------|-----------|
|                           | ADA+/NAb+     | ADA+/NAb- | ADA+/NAb+     | ADA+/NAb- | ADA+/NAb+     | ADA+/NAb- |
| Day 183                   |               |           |               |           |               |           |
| Mean                      | 912           | 8034      | 1239          | 6036      | 535           | 6166      |
| SD                        | 1420.7        | 4355.5    | 2180.9        | 3981.6    | 1013.0        | 4291.8    |
| N                         | 51            | 95        | 22            | 57        | 20            | 46        |
| NALQ*                     | 23            | 95        | 9             | 56        | 6             | 46        |
| Day 211                   |               |           |               |           |               |           |
| Mean                      | 917           | 7589      | 1329          | 5705      | 807.3         | 6325      |
| SD                        | 1545.5        | 4327.8    | 2054.0        | 4026.9    | 1066.4        | 3987.1    |
| N                         | 48            | 96        | 22            | 56        | 20            | 46        |
| NALQ*                     | 24            | 96        | 11            | 55        | 9             | 46        |
| Day 253                   |               |           |               |           |               |           |
| Mean                      | 942           | 7369      | 1258          | 6257      | 1143          | 6462      |

Fleischmann et al., *RMD Open*

| Visit (0 hours post-dose) | ADL-PF/ADL-PF |            | ADL-EU/ADL-EU |            | ADL-EU/ADL-PF |            |
|---------------------------|---------------|------------|---------------|------------|---------------|------------|
|                           | ADA+/NAbs+    | ADA+/NAbs- | ADA+/NAbs+    | ADA+/NAbs- | ADA+/NAbs+    | ADA+/NAbs- |
| SD                        | 1936.3        | 3902.2     | 1823.8        | 4706.9     | 1645.5        | 4397.4     |
| N                         | 45            | 94         | 18            | 55         | 20            | 44         |
| NALQ*                     | 17            | 94         | 10            | 54         | 8             | 44         |
| Day 365                   |               |            |               |            |               |            |
| Mean                      | 1076          | 6603       | 1054          | 5268       | 1598          | 6423       |
| SD                        | 2150.9        | 3521.3     | 1825.6        | 4049.2     | 2539.9        | 4599.8     |
| N                         | 43            | 93         | 17            | 55         | 19            | 45         |
| NALQ*                     | 15            | 91         | 7             | 53         | 9             | 44         |
| EOT/ET/Day 547            |               |            |               |            |               |            |
| Mean                      | 1234          | 2093       | 683           | 2342       |               |            |
| SD                        | 1491.0        | 3386.2     | 1183.6        | 2147.5     |               |            |
| N                         | 7             | 3          | 3             | 2          | 1             | 0          |
| NALQ*                     | 4             | 2          | 1             | 2          | 0             |            |
| Follow-up/Day 575         |               |            |               |            |               |            |

Fleischmann et al., *RMD Open*

| Visit (0 hours post-dose) | ADL-PF/ADL-PF |           | ADL-EU/ADL-EU |           | ADL-EU/ADL-PF |           |
|---------------------------|---------------|-----------|---------------|-----------|---------------|-----------|
|                           | ADA+/NAb+     | ADA+/NAb- | ADA+/NAb+     | ADA+/NAb- | ADA+/NAb+     | ADA+/NAb- |
| Mean                      |               | 279       |               |           | 1240          |           |
| SD                        |               |           |               |           |               |           |
| N                         | 4             | 1         | 2             | 0         | 1             | 0         |
| NALQ*                     | 0             | 1         | 0             |           | 1             |           |

\*Summary statistics were calculated by setting concentration values below the lower limit of quantification (250 ng/mL) to zero.

Summary statistics were not presented if NALQ was zero.

ADL-EU, reference adalimumab sourced from the European Union; ADL-PF, PF-06410293; EOT, end of treatment; ET, early termination; N, number of observations with non-missing concentrations; NAb, neutralising antibody; NALQ, number of observations above the lower limit of quantification; SD, standard deviation.



Fleischmann et al., *RMD Open***Supplemental figure 1.** EULAR response rates by visit (ITT population) in patients

treated with a) ADL-PF/ADL-PF; b) ADL-EU/ADL-EU; and c) ADL-EU/ADL-PF

A) EULAR response rates by visit (ITT population) in patients treated with ADL-PF/ADL-PF

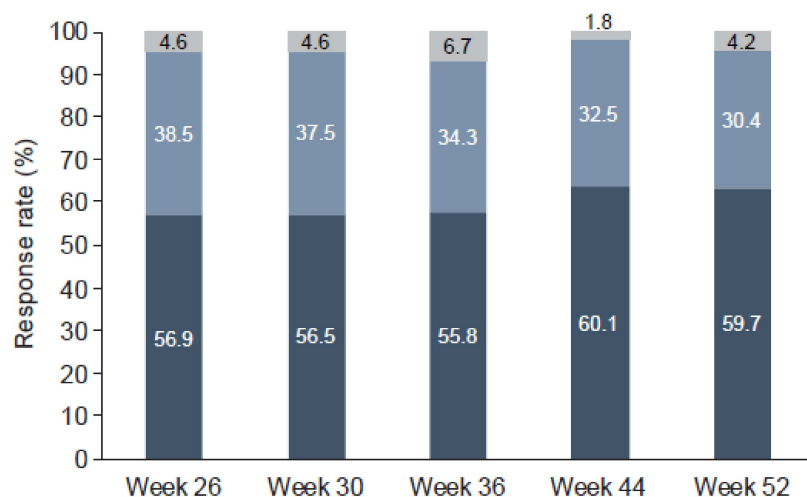

B) EULAR response rates by visit (ITT population) in patients treated with ADL-EU/ADL-EU

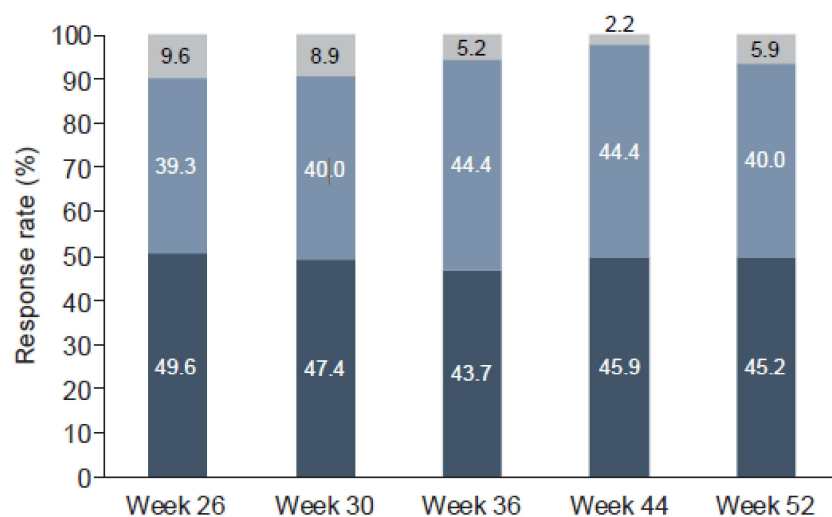

Fleischmann et al., *RMD Open*

C) EULAR response rates by visit (ITT population) in patients treated with ADL-EU/ADL-PF

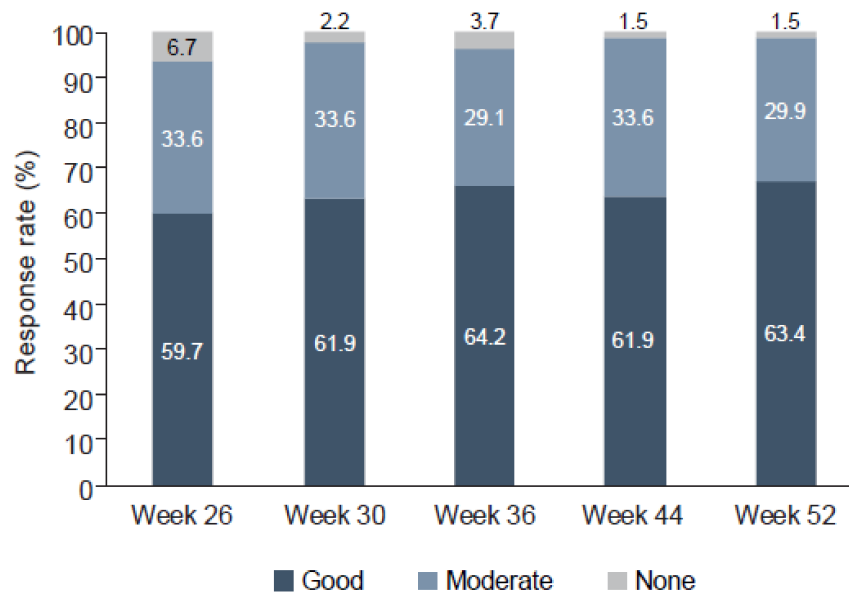

ADL-EU, reference adalimumab sourced from the European Union; ADL-PF, PF-06410293; EULAR, European League Against Rheumatism; ITT, intent-to-treat.

Fleischmann et al., *RMD Open***Supplemental figure 2. DAS28-4(CRP) <2.6 by visit (ITT population)**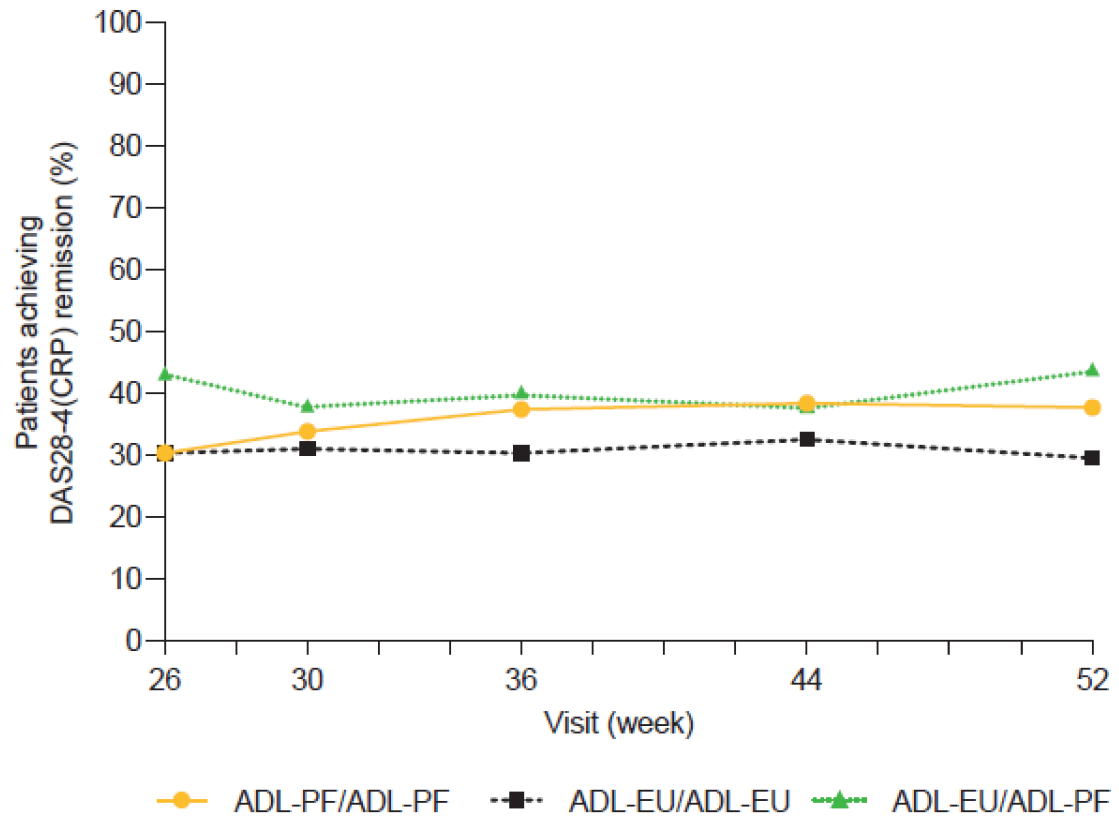

ADL-EU, reference adalimumab sourced from the European Union; ADL-PF, PF-06410293; CRP, C-reactive protein; DAS, Disease Activity Score; ITT, intent-to-treat.

Fleischmann et al., *RMD Open*

**Supplemental figure 3.** ACR/EULAR-defined remission by visit (ITT population) in patients treated with a) ADL-PF/ADL-PF; b) ADL-EU/ADL-EU; and c) ADL-EU/ADL-PF

A) ACR/EULAR-defined remission by visit (ITT population) in patients treated with ADL-PF/ADL-PF

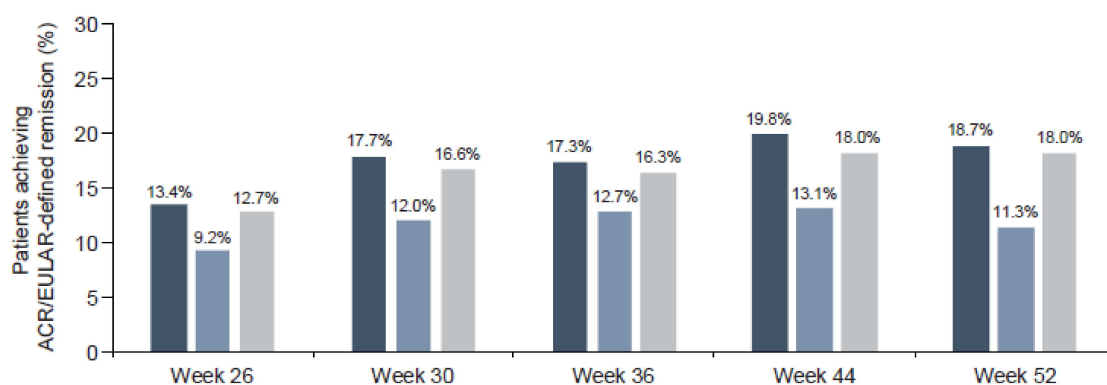

B) ACR/EULAR-defined remission by visit (ITT population) in patients treated with ADL-EU/ADL-EU

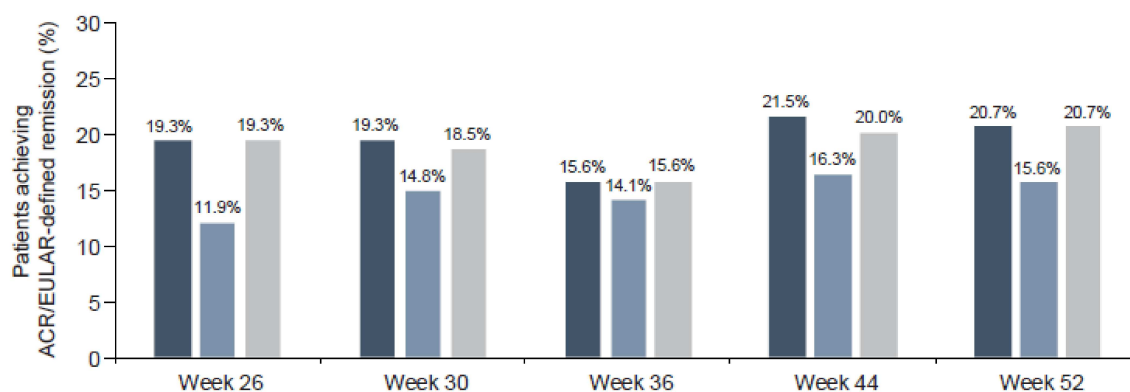

Fleischmann et al., *RMD Open*

C) ACR/EULAR-defined remission by visit (ITT population) in patients treated with ADL-EU/ADL-PF

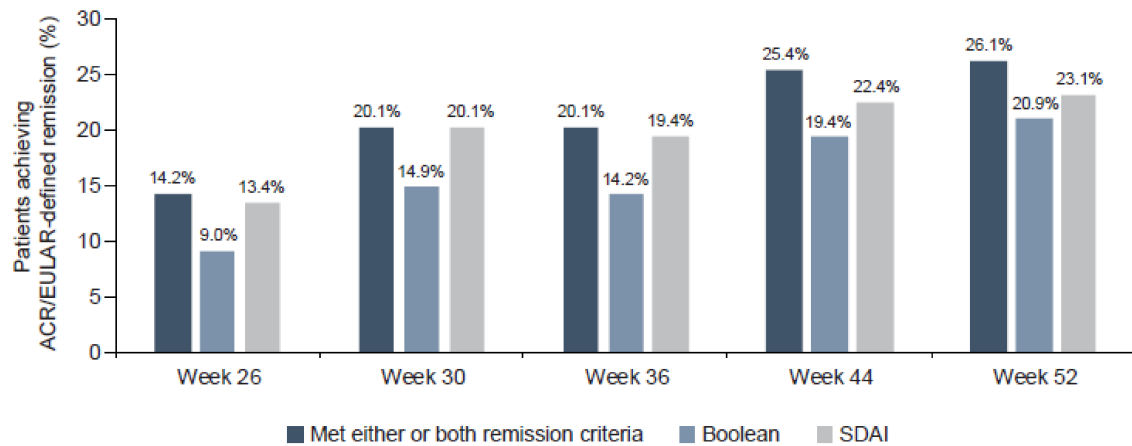

ACR, American College of Rheumatology; ADL-EU, reference adalimumab sourced from the European Union; ADL-PF, PF-06410293; EULAR, European League Against Rheumatism; ITT, intent-to-treat; SDAI, Simplified Disease Activity Index.

Fleischmann et al., *RMD Open*

**Supplemental figure 4.** Mean change ( $\pm$ SE) from week 26 (pre-dose) in HAQ-DI by visit (ITT population)

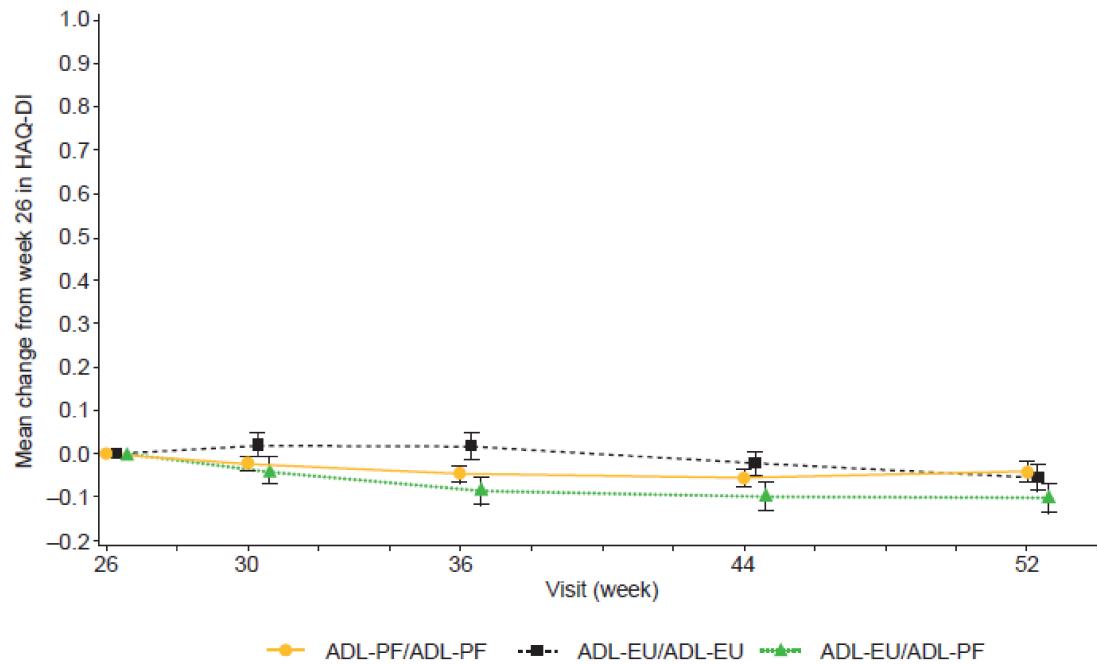

ADL-EU, reference adalimumab sourced from the European Union; ADL-PF, PF-06410293; HAQ-DI, Health Assessment Questionnaire–Disability Index; ITT, intent-to-treat; SE, standard error.
